# Supplementary material for: STEM Is Not a Monolith: A Preliminary Analysis of Variations in STEM Disciplinary Cultures and Implications for Change
Source: Atypon-hosted journal article supplement (doi:10.1187/cbe.19-02-0038), 2019-11-08
Supplement: combinedsupmats.pdf [file combinedsupmats.pdf]

# Supplemental Material

*CBE—Life Sciences Education*

Reinholz *et al.*

## **Supplemental Materials.**

### Plenary survey

1. What is your discipline?
2. Structures: formal roles, responsibilities, practices, and routines that organize who interacts and how (e.g., committee structures, teaching assignments, travel support, faculty vs. staff roles).
3. Symbols: cultural symbols, artifacts, beliefs, language, myths, and values that support meaning making. These are the underlying ways of thinking that give meaning to structures in a department (e.g., empirical model building, societal narratives about intelligence).
4. People: the agents within a department, their goals, agency, needs, and identities (e.g., math departments often have many lower division courses taught by graduate students and contingent faculty).
5. Power: interactions are mediated by power, status, positioning, and political coalitions. What types of hierarchies exist in your discipline? (e.g., the relative status of "true" disciplinarians vs. DBER scholars).
6. What else? What other aspects of your discipline are consequential and worth discussing as a group?
